# Supplementary material
Source: PubMed Central journal article supplement (PMC7948253)
Supplement: NIHMS1668080-supplement-1.pdf [file NIHMS1668080-supplement-1.pdf]

**Supplemental Table 1:** Factors considered for multiple logistic regression model.

|                            | <b>Estimate</b> | <b>Standard Error</b> | <b>Odds Ratio</b> | <b>95% CI</b> | <b>P value</b> |
|----------------------------|-----------------|-----------------------|-------------------|---------------|----------------|
| Disease-free interval      | 0.286           | 0.101                 | 1.33              | 1.09 – 1.62   | 0.0045         |
| Functioning primary tumor  | -2.302          | 0.917                 | 0.10              | 0.02 – 0.60   | 0.012          |
| Number of liver metastases | 0.286           | 0.266                 | 1.33              | 0.79 – 2.24   | 0.28           |
| Resection status           | 0.008           | 0.548                 | 1.01              | 0.34 – 2.95   | 0.99           |
| Extrahepatic disease       | 1.213           | 0.823                 | 3.37              | 0.67 – 16.89  | 0.14           |
| NED after liver procedure  | -1.401          | 1.000                 | 0.25              | 0.04 – 1.75   | 0.16           |

**Prediction Score = 0.2831\*[Disease-free Interval] – 2.0131\*[tumor functional status]**  
**If prediction score  $\geq 0.6633$ , survival is predicted  $\geq 24$  months**  
**If prediction score  $< 0.6633$ , survival is predicted  $< 12$  months**

**Supplemental Figure 1:** Multiple logistic regression model incorporating DFI and tumor functional status.
